# Supplementary material
Source: PubMed Central journal article supplement (PMC2951249)
Supplement: supp_M110.118653_jbc.M110.118653-1.pdf [file supp_M110.118653_jbc.M110.118653-1.pdf]

## SUPPLEMENTAL METHODS

*Antibodies (Abs) and Reagents Used in Immunoblotting and Coimmunoprecipitation Analyses.* Abs against MEK1/2, phospho-MEK1/2 (Ser-217/221), ERK1/2, phospho-ERK1/2 (Thr-202/Tyr-204) and HA-tag (6E2) were purchased from Cell Signaling Technology (Danvers, MA). Abs against GATA-1 (N6) and Flag-tag (M2) were purchased from Santa Cruz Biotechnology and Sigma-Aldrich, respectively. Immunoreactive proteins were visualized with the enhanced chemiluminescence detection system (PerkinElmer Life Sciences, Boston, MA).

*Preparation of Retrovirus Particles.* An ecotropic packaging cell line, 293gp, kindly provided by Dr. H. Miyoshi (RIKEN BioResource Center, Tsukuba, Japan), was transfected with each retrovirus vector together with a retrovirus envelope construct (pCMV-VSV-G), by the calcium phosphate coprecipitation method. After 12–16 hours, the cells were washed and cultured in DMEM containing 10 % FBS for 2 days. Then, the supernatant containing virus particles was collected, centrifuged (4910 g × 16 hours), and concentrated 200-fold in volume.

**Supplemental Table.** Oligonucleotide primers used for semiquantitative/real-time RT-PCR analyses.

| <b>Primers</b>                 |                  | <b>Sequence from 5' to 3'</b> |
|--------------------------------|------------------|-------------------------------|
| <b>p16<sup>INK4a</sup></b>     | <b>(forward)</b> | GAACTCTTTCGGTCGTACCC          |
|                                | <b>(reverse)</b> | CGAATCTGCACCGTAGTTGA          |
| <b>p19<sup>ARF</sup></b>       | <b>(forward)</b> | GCTCTGGCTTTCGTGAACAT          |
|                                | <b>(reverse)</b> | TCGCACGATGTCTTGATGTC          |
| <b>p21<sup>CIP1/WAF1</sup></b> | <b>(forward)</b> | ACAAGAGGCCCACTACTTCC          |
|                                | <b>(reverse)</b> | GAAGACCAATCTGCGCTTGG          |
| <b>HPRT</b>                    | <b>(forward)</b> | CACAGGACTAGAACACCTGC          |
|                                | <b>(reverse)</b> | GCTGGTGAAAAGGACCTCT           |
